# Supplementary material
Source: HighWire-hosted journal article supplement (https://www.jrheum.org/highwire/filestream/38712/field_highwire_adjunct_files/0/200056DataSuppl.pdf)
Supplement: 200056DataSuppl.pdf [file 200056DataSuppl.pdf]

## ONLINE SUPPLEMENTARY MATERIAL

### Supplementary Table 1.

HAZARD RATIOS (95% CI) FOR THE ASSOCIATION BETWEEN COVARIATES AND RHEUMATOID ARTHRITIS IN NURSES' HEALTH STUDY (NHS, 1986-2014) AND NURSES' HEALTH STUDY II (NHS II, 1993-2015), ADJUSTED FOR AGE.

| <i>Covariate</i>                                        | <i>HR (95% CI)</i> |
|---------------------------------------------------------|--------------------|
| Smoking (pack years)                                    |                    |
| 0                                                       | 1.00 (Ref)         |
| >0 to 20                                                | 1.21 (0.94, 1.32)  |
| 20+                                                     | 1.67 (1.41, 1.98)  |
| Diet (Alternate Healthy Eating Index score)             |                    |
| Quartile 1                                              | 1.00 (Ref)         |
| Quartile 2                                              | 1.08 (0.90, 1.30)  |
| Quartile 3                                              | 0.92 (0.76, 1.12)  |
| Quartile 4                                              | 0.87 (0.43, 1.55)  |
| Physical activity (metabolic equivalent hours per week) |                    |
| Quartile 1                                              | 1.00 (Ref)         |
| Quartile 2                                              | 0.93 (0.75, 1.14)  |
| Quartile 3                                              | 0.90 (0.73, 1.06)  |
| Quartile 4                                              | 0.93 (0.34, 2.53)  |
| Menopausal status and hormone use                       |                    |
| Premenopausal                                           | 1.00 (Ref)         |
| Postmenopausal with never use                           | 1.16 (0.87, 1.53)  |
| Postmenopausal with current use                         | 1.40 (1.71, 1.83)  |
| Postmenopausal past use                                 | 1.39 (1.04, 1.85)  |

**Supplementary Table 2.**

HAZARD RATIOS (95% CI) FOR THE ASSOCIATION BETWEEN WAIST CIRCUMFERENCE AND RHEUMATOID ARTHRITIS IN  
NURSES' HEALTH STUDY (NHS, 1986-2014) AND NURSES' HEALTH STUDY II (NHS II, 1993-2015), ALL MODELS

| <i>FULL COHORT</i>                               | <i>Waist circumference category</i> |          |                      |                      |                      |                      |                      |
|--------------------------------------------------|-------------------------------------|----------|----------------------|----------------------|----------------------|----------------------|----------------------|
|                                                  | <i>HR (95% CI)</i>                  |          |                      |                      |                      |                      |                      |
| <i>Models</i>                                    | <i>1</i>                            | <i>2</i> | <i>3</i>             | <i>4</i>             | <i>5</i>             | <i>6</i>             | <i>7</i>             |
| Model 1: Age-adjusted                            | 0.82<br>(0.59, 1.14)                | 1.00 Ref | 0.80<br>(0.61, 1.05) | 1.05<br>(0.81, 1.35) | 1.33<br>(1.03, 1.72) | 1.12<br>(0.84, 1.72) | 1.33<br>(1.05, 1.67) |
| Model 2: Model 1 + smoking                       | 0.82<br>(0.59, 1.13)                | 1.00 Ref | 0.80<br>(0.61, 1.05) | 1.04<br>(0.80, 1.35) | 1.32<br>(1.02, 1.70) | 1.11<br>(0.83, 1.47) | 1.31<br>(1.03, 1.65) |
| Model 3: Model 2 + diet                          | 0.82<br>(0.59, 1.13)                | 1.00 Ref | 0.80<br>(0.61, 1.04) | 1.04<br>(0.80, 1.34) | 1.31<br>(1.01, 1.69) | 1.10<br>(0.83, 1.46) | 1.29<br>(1.02, 1.63) |
| Model 4: Model 3 + physical activity             | 0.82<br>(0.59, 1.13)                | 1.00 Ref | 0.80<br>(0.61, 1.05) | 1.04<br>(0.80, 1.34) | 1.31<br>(1.01, 1.69) | 1.10<br>(0.83, 1.46) | 1.29<br>(1.02, 1.63) |
| Model 5: Model 4 + menopausal status/hormone use | 0.82<br>(0.59, 1.13)                | 1.00 Ref | 0.80<br>(0.61, 1.05) | 1.04<br>(0.80, 1.35) | 1.32<br>(1.02, 1.70) | 1.10<br>(0.83, 1.47) | 1.30<br>(1.03, 1.65) |
| Model 6: Model 5 + body mass index               | 0.83<br>(0.60, 1.16)                | 1.00 Ref | 0.78<br>(0.60, 1.03) | 0.99<br>(0.76, 1.29) | 1.23<br>(0.94, 1.60) | 1.00<br>(0.75, 1.35) | 1.10<br>(0.83, 1.47) |

Category definitions for each variable: WC <27, 27-<29 (reference), 29-<31, 31-<33, 33-<35, 35-<37, and 37+ inches; smoking pack-years (0, >0-20, 20+ pack years); alternate healthy eating index (diet score quartiles); physical activity (quartiles of metabolic equivalent hours per week); menopausal status and postmenopausal hormone use (premenopausal, PMH with never use, PMH with current use, and PMH past use).

**Supplementary Table 3.**

HAZARD RATIOS (95% CI) FOR THE ASSOCIATION BETWEEN WAIST CIRCUMFERENCE AND SEROPOSITIVE RHEUMATOID ARTHRITIS AMONG YOUNGER WOMEN IN NURSES' HEALTH STUDY (NHS, 1986-2014) AND NURSES' HEALTH STUDY II (NHS II, 1993-2015), ALL MODELS

| <i>SEROPOSITIVE / YOUNGER AGE</i>                | <i>Waist circumference category<br/>HR (95% CI)</i> |          |                      |                      |                      |                      |                      |
|--------------------------------------------------|-----------------------------------------------------|----------|----------------------|----------------------|----------------------|----------------------|----------------------|
| <i>Models</i>                                    | <i>1</i>                                            | <i>2</i> | <i>3</i>             | <i>4</i>             | <i>5</i>             | <i>6</i>             | <i>7</i>             |
| Model 1: Age-adjusted                            | 0.66<br>(0.36, 1.22)                                | 1.00 Ref | 0.79<br>(0.47, 1.34) | 0.90<br>(0.52, 1.56) | 0.95<br>(0.53, 1.72) | 1.40<br>(0.78, 2.51) | 1.77<br>(1.13, 2.79) |
| Model 2: Model 1 + smoking                       | 0.65<br>(0.35, 1.20)                                | 1.00 Ref | 0.79<br>(0.47, 1.33) | 0.89<br>(0.52, 1.53) | 0.93<br>(0.52, 1.68) | 1.36<br>(0.76, 2.44) | 1.72<br>(1.09, 2.71) |
| Model 3: Model 2 + diet                          | 0.66<br>(0.36, 1.22)                                | 1.00 Ref | 0.78<br>(0.46, 1.32) | 0.86<br>(0.50, 1.48) | 0.89<br>(0.49, 1.62) | 1.30<br>(0.72, 2.33) | 1.61<br>(1.02, 2.55) |
| Model 4: Model 3 + physical activity             | 0.66<br>(0.36, 1.22)                                | 1.00 Ref | 0.78<br>(0.46, 1.32) | 0.86<br>(0.50, 1.49) | 0.90<br>(0.50, 1.63) | 1.31<br>(0.73, 2.35) | 1.66<br>(1.04, 2.63) |
| Model 5: Model 4 + menopausal status/hormone use | 0.66<br>(0.36, 1.22)                                | 1.00 Ref | 0.78<br>(0.46, 1.32) | 0.87<br>(0.50, 1.50) | 0.90<br>(0.50, 1.63) | 1.31<br>(0.73, 2.35) | 1.66<br>(1.04, 2.63) |
| Model 6: Model 5 + body mass index               | 0.69<br>(0.37, 1.27)                                | 1.00 Ref | 0.75<br>(0.44, 1.27) | 0.79<br>(0.45, 1.37) | 0.78<br>(0.42, 1.43) | 1.07<br>(0.57, 1.97) | 1.12<br>(0.61, 2.04) |

Category definitions for each variable: WC <27, 27-<29 (reference), 29-<31, 31-<33, 33-<35, 35-<37, and 37+ inches; smoking pack-years (0, >0-20, 20+ pack years); alternate healthy eating index (diet score quartiles); physical activity (quartiles of metabolic equivalent hours per week); menopausal status and postmenopausal hormone use (premenopausal, PMH with never use, PMH with current use, and PMH past use).
